# Supplementary material for: Cannabinoid-induced actomyosin contractility shapes neuronal morphology and growth
Source: eLife journal article supplement (doi:10.7554/elife.03159), 2014-09-10
Supplement: supp [file elife-03159-supp-v1.zip]

Archive with 15 entries (15 files):
- elife_poa_e03159_Figure_2_figure_supplement_3.pdf
- elife_poa_e03159_Figure_2_figure_supplement_2.pdf
- elife_poa_e03159_Video_4.mov
- elife_poa_e03159_Video_3.mov
- elife_poa_e03159_Video_8.mov
- elife_poa_e03159_Figure_3_figure_supplement_2.pdf
- elife_poa_e03159_Video_7.mov
- elife_poa_e03159_Video_1.mov
- elife_poa_e03159_Figure_2_figure_supplement_1.pdf
- elife_poa_e03159_Figure_1_figure_supplement_1.pdf
- elife_poa_e03159_Video_5.mov
- elife_poa_e03159_Figure_3_figure_supplement_1.pdf
- elife_poa_e03159_Video_6.mov
- elife_poa_e03159_Figure_5_figure_supplement_1.pdf
- elife_poa_e03159_Video_2.mov
