# Supplementary material for: Cannabinoid-induced actomyosin contractility shapes neuronal morphology and growth
Source: eLife journal article supplement (doi:10.7554/elife.03159), 2014-09-10
Supplement: supp [file elife-03159-supp-v1.zip › elife_poa_e03159_Figure_2_figure_supplement_1.pdf]

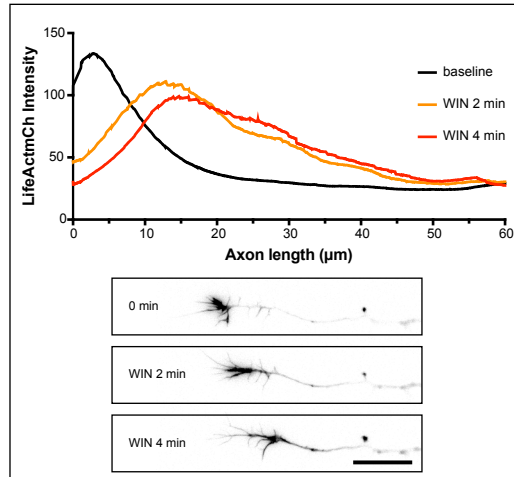

Figure 2 - figure supplement 1: Averaged F-actin relocation in the distal 60  $\mu\text{m}$  in growth cones in the first 4 minutes after WIN treatment in 5 randomly chosen neurons from Fig. 1C. Black, orange and red curves represent the mean intensity of LifeAct-mCherry labeling at baseline, at 2 minutes and 4 minutes after addition of WIN (100 nM), respectively. Scale bar: 20  $\mu\text{m}$
