# Supplementary material for: Cannabinoid-induced actomyosin contractility shapes neuronal morphology and growth
Source: eLife journal article supplement (doi:10.7554/elife.03159), 2014-09-10
Supplement: supp [file elife-03159-supp-v1.zip › elife_poa_e03159_Figure_2_figure_supplement_2.pdf]

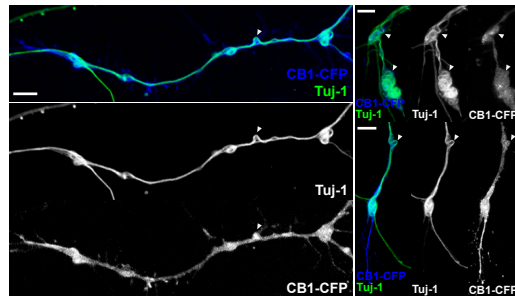

Figure 2 - figure supplement 2: CB1R-induced periodic microtubule bends are not due to EB3-eGFP and LifeAct-mCherry expression. Cultured hippocampal neurons were transfected at DIV6 with CB1R-eCFP and treated after 24 hours with 100 nM WIN55,212-2 for 10 min before fixation. Presence of periodic bends is shown by immunolabeling microtubules with anti-Tuj1 antibody. Scale bar: 5  $\mu$ m
