# Supplementary material for: Cannabinoid-induced actomyosin contractility shapes neuronal morphology and growth
Source: eLife journal article supplement (doi:10.7554/elife.03159), 2014-09-10
Supplement: supp [file elife-03159-supp-v1.zip › elife_poa_e03159_Figure_2_figure_supplement_3.pdf]

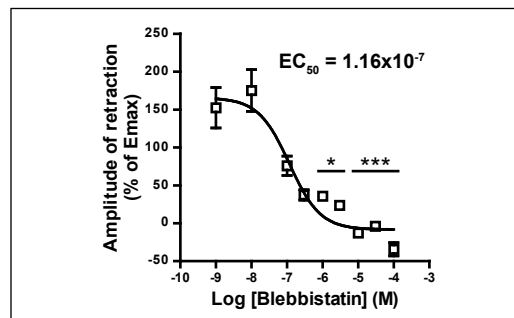

Figure 2 - figure supplement 3: Concentration-response curve for the Blebbistatin effect on the growth-cone retraction assay, after treatment with WIN (100 nM). \*P<0.05; \*\*\*P<0.001 vs. no Blebbistatin, calculated using Kruskal-Wallis one-way ANOVA followed by Dunn's post-test.
