# Supplementary figures and images for: Cannabinoid-induced actomyosin contractility shapes neuronal morphology and growth
Source: eLife journal article supplement (doi:10.7554/elife.03159), 2014-09-10

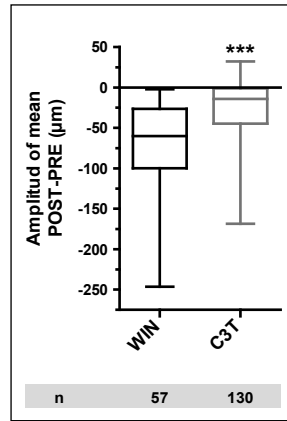

Supplement: supp [file elife-03159-supp-v1.zip › elife_poa_e03159_Figure_3_figure_supplement_2.pdf]

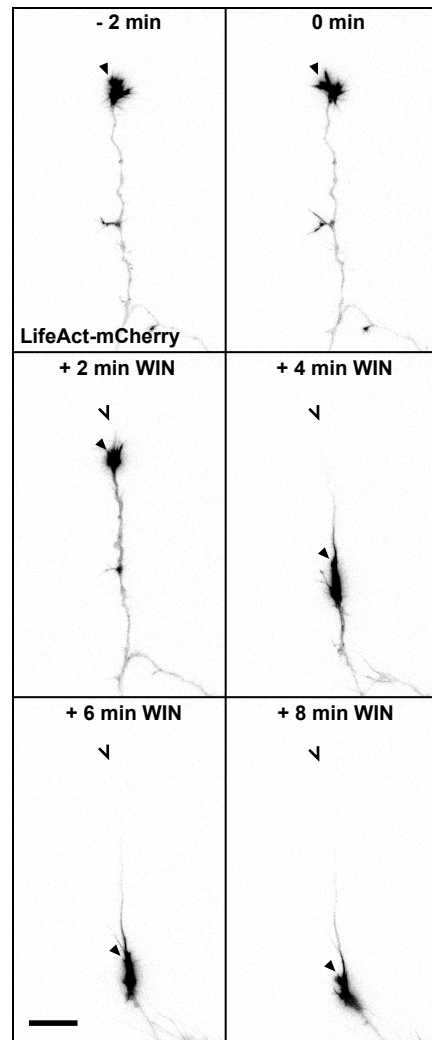

Figure 1 - figure supplement 1: mCherry-LifeAct label (red channel) from Fig 1A. Scale bar: 20  $\mu\text{m}$

Supplement: supp [file elife-03159-supp-v1.zip › elife_poa_e03159_Figure_1_figure_supplement_1.pdf]

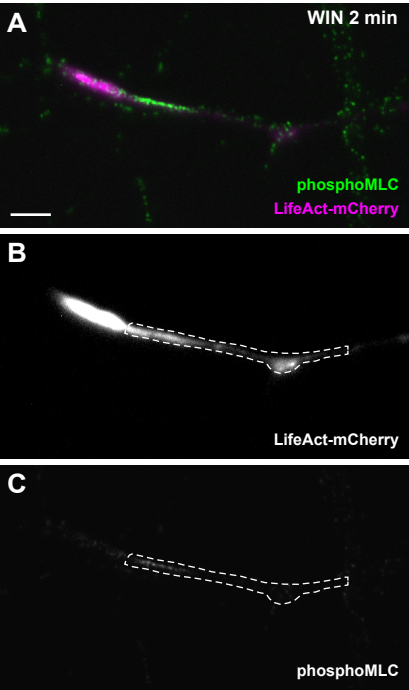

Supplement: supp [file elife-03159-supp-v1.zip › elife_poa_e03159_Figure_3_figure_supplement_1.pdf]

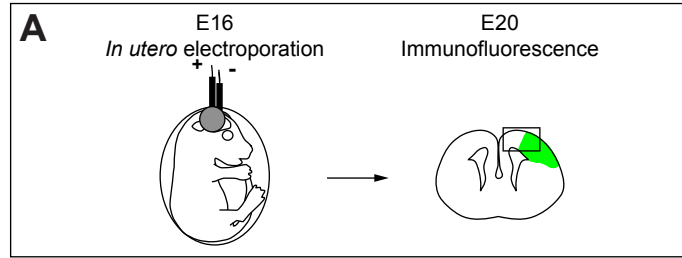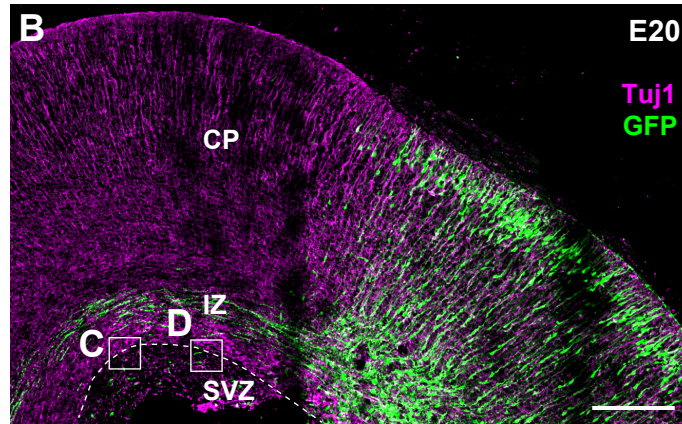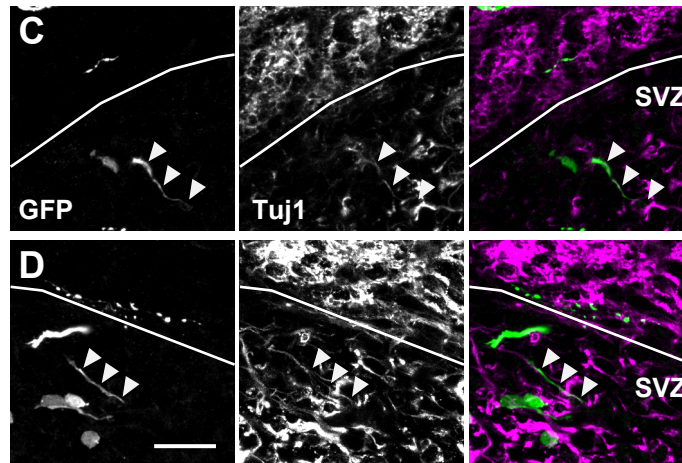

Supplement: supp [file elife-03159-supp-v1.zip › elife_poa_e03159_Figure_5_figure_supplement_1.pdf]
